# Supplementary material for: The dipolarity/polarisability of 1-alkyl-3-methylimidazolium ionic liquids as function of anion structure and the alkyl chain length
Source: Royal Society of Chemistry journal article supplement (doi:10.1039/b9nj00751b), 2010-01-01
Supplement: b9nj00751b.pdf [file b9nj00751b.pdf]

## Supplementary Information

### **The dipolarity/polarisability of 1-alkyl-3-methylimidazolium ionic liquids as function of anion structure and the alkyl chain length**

Ralf Lungwitz,<sup>a</sup> Veronika Strehmel<sup>b</sup> and Stefan Spange\*<sup>a</sup>

<sup>a</sup> Department of Chemistry, Chemnitz University of Technology, Strasse der Nationen 62, 09107 Chemnitz, Germany

<sup>b</sup> Institute of Applied Polymer Chemistry, University of Potsdam, Karl-Liebknecht-Strasse 24-25, 14476 Potsdam-Golm, Germany.  
E-mail: stefan.spange@chemie.tu-chemnitz.de

#### Content

Catalán solvent parameter data and the UV/Vis absorption maxima of dissolved dye **1**

UV/Vis absorption maxima of **2** and **3** in [Rmim] Ionic Liquids with R = *n*-hexyl, *n*-octyl, and *n*-decyl for various anions

Results of the correlation of the determined  $\pi^*$  values with the product of  $\alpha$  with  $\beta$  for [Rmim] Ionic Liquids with 6 various anions

Catalán solvent parameter data and the UV/Vis absorption maxima of dissolved dye 1

| solvent                   | $\tilde{\nu}_{\max(1)} / 10^{-3} \text{cm}^{-1}$<br>a) | $SP^{b)}$ | $SdP^{b)}$ | $SA^{b)}$ | $SB^{b)}$ |
|---------------------------|--------------------------------------------------------|-----------|------------|-----------|-----------|
| <i>n</i> -hexane          | 17.67                                                  | 0.616     | 0          | 0         | 0.056     |
| cyclohexane               | 17.51                                                  | 0.683     | 0          | 0         | 0.073     |
| triethylamine             | 17.33                                                  | 0.660     | 0.108      | 0         | 0.885     |
| CCl <sub>4</sub>          | 17.21                                                  | 0.768     | 0          | 0         | 0.104     |
| diethyl ether             | 17.12                                                  | 0.617     | 0.385      | 0         | 0.562     |
| <i>p</i> -xylene          | 17.01                                                  | 0.778     | 0.175      | 0         | 0.160     |
| toluene                   | 16.95                                                  | 0.782     | 0.284      | 0         | 0.128     |
| benzene                   | 16.92                                                  | 0.793     | 0.270      | 0         | 0.124     |
| THF                       | 16.42                                                  | 0.714     | 0.634      | 0         | 0.591     |
| acetic acid               | 16.45                                                  | 0.651     | 0.676      | 0.689     | 0.390     |
| chloroform                | 16.39                                                  | 0.783     | 0.614      | 0.047     | 0.071     |
| anisole                   | 16.31                                                  | 0.820     | 0.543      | 0.084     | 0.299     |
| dichloromethane           | 16.29                                                  | 0.761     | 0.769      | 0.040     | 0.178     |
| acetone                   | 16.21                                                  | 0.651     | 0.907      | 0         | 0.475     |
| 1,2-dichloroethane        | 16.23                                                  | 0.771     | 0.742      | 0.030     | 0.126     |
| ethanol                   | 16.18                                                  | 0.633     | 0.783      | 0.400     | 0.658     |
| methanol                  | 16.15                                                  | 0.608     | 0.904      | 0.605     | 0.545     |
| 1-butanol                 | 16.16                                                  | 0.674     | 0.655      | 0.341     | 0.809     |
| trifluoroethanol          | 16.08                                                  | 0.543     | 0.922      | 0.893     | 0.107     |
| 1,1,2,2-tetrachloroethane | 16.08                                                  | 0.845     | 0.792      | 0         | 0.017     |
| nitromethane              | 16.05                                                  | 0.710     | 0.954      | 0.078     | 0.236     |
| dimethylformamide         | 15.82                                                  | 0.759     | 0.977      | 0.031     | 0.613     |
| benzyl alcohol            | 15.75                                                  | 0.861     | 0.788      | 0.409     | 0.461     |
| 1,2-ethandiol             | 15.75                                                  | 0.777     | 0.910      | 0.717     | 0.534     |
| formamide                 | 15.72                                                  | 0.814     | 1.006      | 0.549     | 0.414     |
| dimethylsulfoxide         | 15.65                                                  | 0.830     | 1.000      | 0.072     | 0.647     |

a) S. Spange, R. Sens, Y. Zimmermann, A. Seifert, I. Roth, S. Anders and K. Hofmann, *New J. Chem.*, 2003, **27**, 520.

b) J. Catalán, *J. Phys. Chem. B*, 2009, **113**, 5951.

UV/Vis absorption maxima of 2 and 3 in [Rmim] Ionic Liquids with R = *n*-hexyl, *n*-octyl, and *n*-decyl for various anions

| Ionic Liquid                                         | $\tilde{\nu}_{\max(2)} / 10^{-3}\text{cm}^{-1}$ | $\tilde{\nu}_{\max(3)} / 10^{-3}\text{cm}^{-1}$ |
|------------------------------------------------------|-------------------------------------------------|-------------------------------------------------|
| [C <sub>6</sub> mim]Cl                               | 14.35                                           | 16.84                                           |
| [C <sub>8</sub> mim]Cl                               | 14.31                                           | 16.83                                           |
| [C <sub>10</sub> mim]Cl                              | 14.29                                           | 16.84                                           |
| [C <sub>6</sub> mim]NO <sub>3</sub>                  | 15.41                                           | 17.04                                           |
| [C <sub>8</sub> mim]NO <sub>3</sub>                  | 15.20                                           | 16.95                                           |
| [C <sub>10</sub> mim]NO <sub>3</sub>                 | 15.15                                           | 16.95                                           |
| [C <sub>6</sub> mim]N(CN) <sub>2</sub>               | 15.77                                           | 17.12                                           |
| [C <sub>8</sub> mim]N(CN) <sub>2</sub>               | 15.68                                           | 17.09                                           |
| [C <sub>10</sub> mim]N(CN) <sub>2</sub>              | 15.65                                           | 17.12                                           |
| [C <sub>6</sub> mim]BF <sub>4</sub>                  | 16.18                                           | 17.12                                           |
| [C <sub>8</sub> mim]BF <sub>4</sub>                  | 16.05                                           | 17.15                                           |
| [C <sub>10</sub> mim]BF <sub>4</sub>                 | 15.95                                           | 17.18                                           |
| [C <sub>6</sub> mim]PF <sub>6</sub>                  | 16.72                                           | 17.27                                           |
| [C <sub>8</sub> mim]PF <sub>6</sub>                  | 16.56                                           | 17.30                                           |
| [C <sub>10</sub> mim]PF <sub>6</sub>                 | 16.47                                           | 17.21                                           |
| [C <sub>6</sub> mim]CF <sub>3</sub> SO <sub>3</sub>  | 16.16                                           | 17.18                                           |
| [C <sub>8</sub> mim]CF <sub>3</sub> SO <sub>3</sub>  | 16.00                                           | 17.21                                           |
| [C <sub>10</sub> mim]CF <sub>3</sub> SO <sub>3</sub> | 15.97                                           | 17.21                                           |
| [C <sub>6</sub> mim]Ntf <sub>2</sub>                 | 16.98                                           | 17.27                                           |
| [C <sub>8</sub> mim]Ntf <sub>2</sub>                 | 16.84                                           | 17.21                                           |
| [C <sub>10</sub> mim]Ntf <sub>2</sub>                | 16.75                                           | 17.21                                           |

Results of the correlation of the determined  $\pi^*$  values with the product of  $\alpha$  with  $\beta$  for [Rmim] Ionic Liquids with 6 various anions

Anions: Cl<sup>-</sup>, NO<sub>3</sub><sup>-</sup>, N(CN)<sub>2</sub><sup>-</sup>, BF<sub>4</sub><sup>-</sup>, PF<sub>6</sub><sup>-</sup>, Ntf<sub>2</sub><sup>-</sup>

General formula:  $\pi^* = A + B(\alpha \times \beta)$

| Cation                | A    | B    | $r^2$ | sd   | n | F      |
|-----------------------|------|------|-------|------|---|--------|
| [Bmim]                | 0.12 | 3.14 | 0.85  | 0.05 | 6 | 0.0093 |
| [C <sub>6</sub> mim]  | 0.42 | 2.00 | 0.88  | 0.03 | 6 | 0.0050 |
| [C <sub>8</sub> mim]  | 0.44 | 1.80 | 0.79  | 0.03 | 6 | 0.0167 |
| [C <sub>10</sub> mim] | 0.57 | 1.22 | 0.64  | 0.03 | 6 | 0.0560 |

$r^2$  = correlation coefficient; sd = standard deviation; n = number of solvents; F = significance.
